# Supplementary material for: Two novel Co(ii) coordination polymers based on 1,4-bis(3-pyridylaminomethyl)benzene as electrocatalysts for oxygen evolution from water
Source: Royal Society of Chemistry journal article supplement (doi:10.1039/c3dt50697e), 2013-01-01
Supplement: c3dt50697e.pdf [file c3dt50697e.pdf]

# Two Novel Co(II) Coordination Polymers Based on 1,4-bis(3-pyridylaminomethyl)benzene as electrocatalysts for the oxygen evolution from water

Yun Gong,<sup>a</sup> Zhi Hao,<sup>a</sup> Peng-Gang Jiang,<sup>a</sup> Jun-Liang Sun<sup>b</sup> and Jian-Hua Lin<sup>\*a</sup>

<sup>a</sup>*Department of Applied Chemistry, College of Chemistry and Chemical Engineering, Chongqing University, Chongqing 400030, P. R. China Tel: +86-023-65102316 E-mail: jhlin@cqu.edu.cn or jhlin@pku.edu.cn*

<sup>b</sup>*State Key Laboratory of Rare Earth Materials Chemistry and Applications, College of Chemistry and Molecular Engineering, Peking University, Beijing 100871, China*

## Determination of Faradaic Efficiency

Controlled potential electrolyses were conducted in a 30 mL aqueous solution buffered to neutral pH (0.2 M phosphate, pH 6.8) at an applied potential of  $\square+1.4$  V vs SCE ( $\eta = 0.81$  V) for 2 hours. Assuming 100% Faradaic efficiency, the theoretical pH change over time can be calculated by the equation of  $\text{pH} = 14 + \lg \{ \Sigma(\text{It})/(\text{FV}) \}$ , where I = current (A), t = time (s), F = Faraday constant (96485 C/mol), V = solution volume (0.03 L).<sup>1</sup> The generated O<sub>2</sub> volume during electrolysis was quantitatively and qualitatively analyzed by using a GC instrument (Shimadzu GC-8A) equipped with a 1 m column filled with Molecular Sieve 13X using He as the carrier gas and GC-MS instrument (Shimadzu GCMS-QP 1000EX), respectively. The theoretical (assuming 100% Faradic efficiency) O<sub>2</sub> volume is based on the amount of consumed charge during the course of electrolysis.

**Table S1** Selected bond lengths (Å) and angles (°) for complexes **1-2**

| <i>Complex 1</i>    |            |                   |            |
|---------------------|------------|-------------------|------------|
| Co(1)-N(1)          | 2.105(14)  | Co(2)-N(5)        | 2.019(14)  |
| Co(3)-N(3)#3        | 2.074(12)  | Co(1)-O(11)#1     | 2.006(15)  |
| Co(2)-O(10)         | 2.141(15)  | Co(3)-O(8)#2      | 2.121(13)  |
| O(9)-Co(1)-O(1)     | 164.7(5)   | O(6)-Co(2)-O(10)  | 86.2(6)    |
| O(5)-Co(1)-O(9)     | 92.2(6)    | O(7)-Co(3)-N(3)#3 | 105.9(5)   |
| O(5)-Co(1)-N(1)     | 95.7(6)    | O(1)-Co(1)-N(1)   | 89.8(5)    |
| <i>Complex 2</i>    |            |                   |            |
| Co(1)-O(3)#4        | 2.062(6)   | Co(1)-O(7)        | 2.140(6)   |
| Co(1)-O(2)          | 2.160(7)   | Co(1)-O(1)        | 2.230(6)   |
| Co(1)-N(2)          | 2.185(8)   | Co(1)-N(4)#3      | 2.190(8)   |
| O(2)-Co(1)-O(1)     | 60.1(2)    | O(3)#4-Co(1)-O(1) | 164.0(2)   |
| O(3)#4-Co(1)-N(4)#3 | 84.6(3)    | N(4)#3-Co(1)-O(1) | 93.6(3)    |
| N(2)-Co(1)-O(1)     | 92.0(3)    | N(2)-Co(1)-N(4)#3 | 173.8(3)   |
| N(4)#5-Cd(1)-N(1)   | 173.89(16) | N(8)#5-Cd(2)-N(5) | 175.40(17) |

Symmetry transformations used to generate equivalent atoms:

#1 -x+1,-y+2,-z+1 #2 -x+1,-y+1,-z #3 -x+2,-y,-z #4 x,y-1,z #5 x,y+1,z

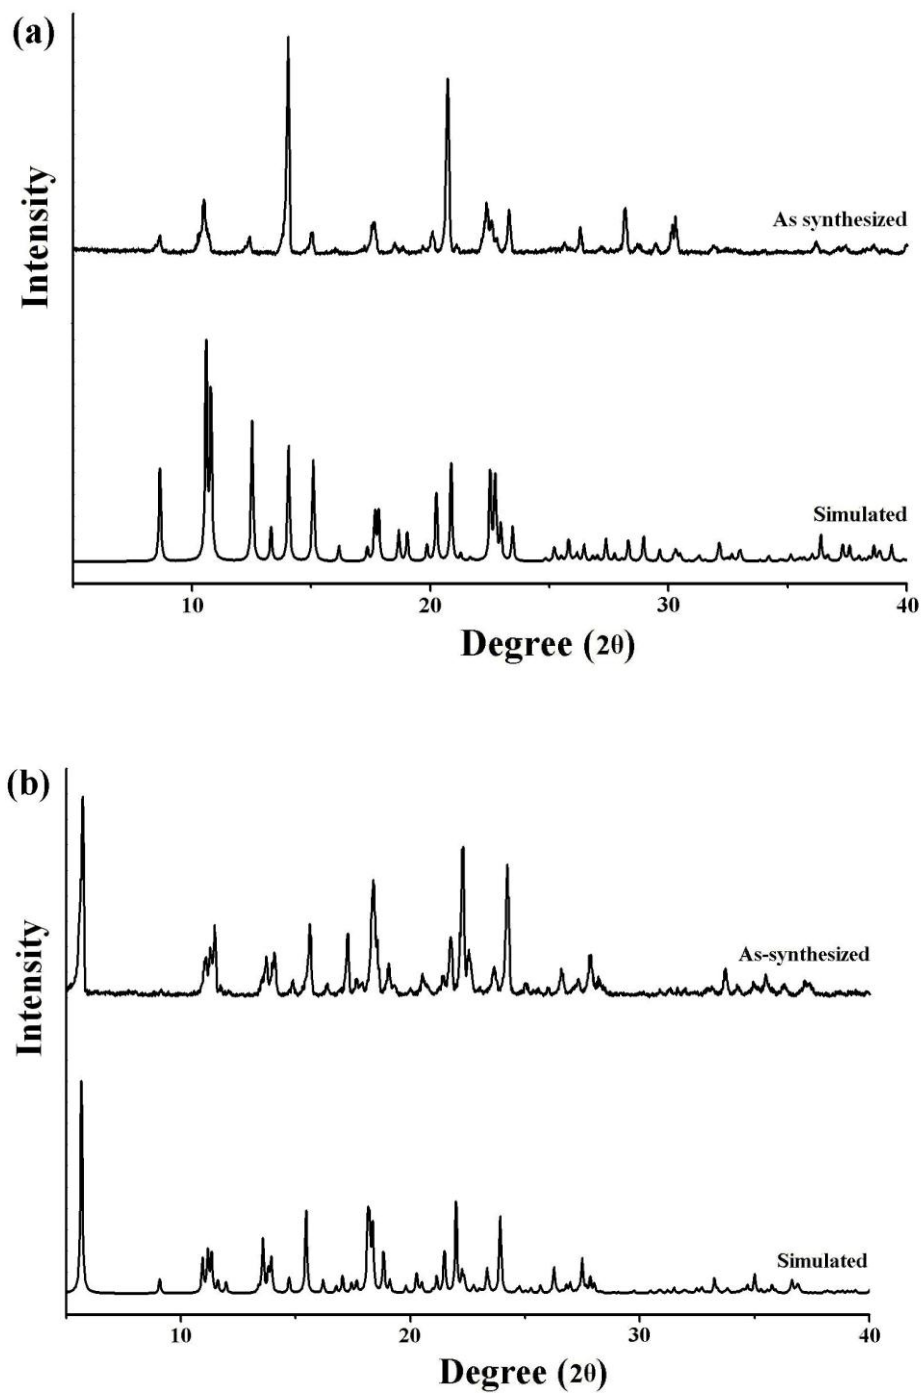

**Fig.S1** The PXRD patterns of complexes **1** (a) and **2** (b).

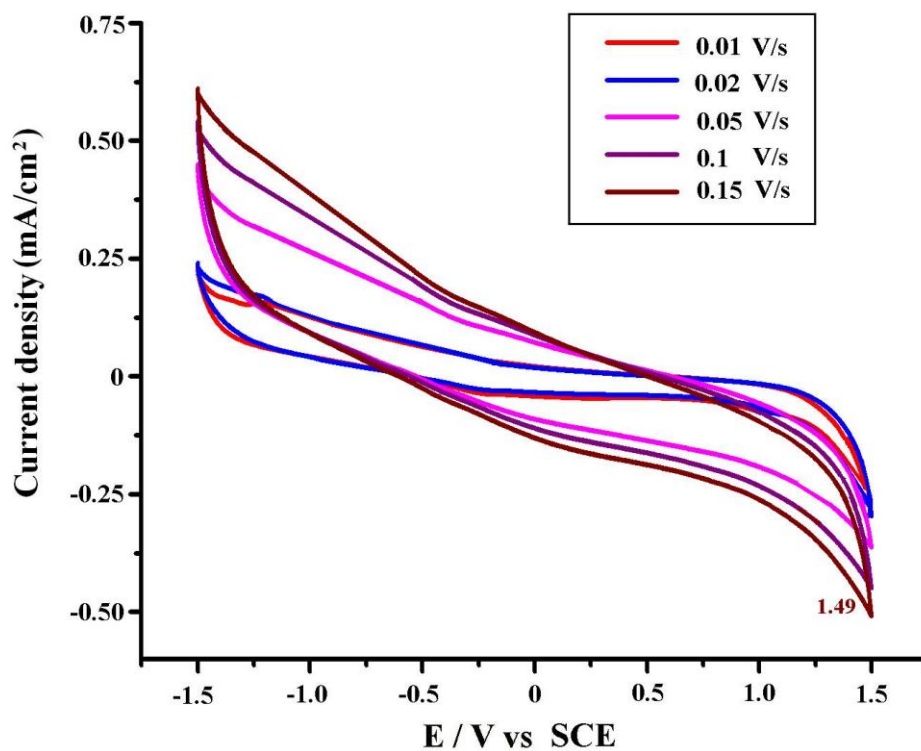

**Fig. S2** Cyclic voltammograms of the bare **GCE** in an aqueous solution buffered to neutral pH (0.2 M phosphate, pH = 6.8) at different sweep rates.

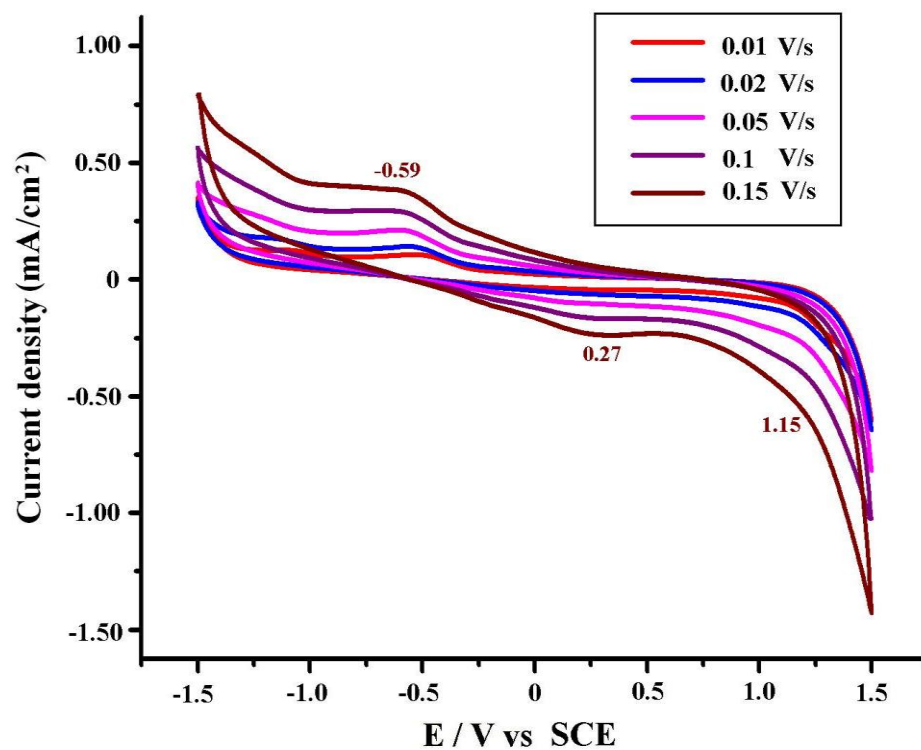

**Fig. S3** Cyclic voltammograms of the bare **GCE** in an aqueous solution buffered to neutral pH (0.2 M phosphate, pH = 6.8) containing 4 mg **H<sub>2</sub>adip** at different sweep rates.

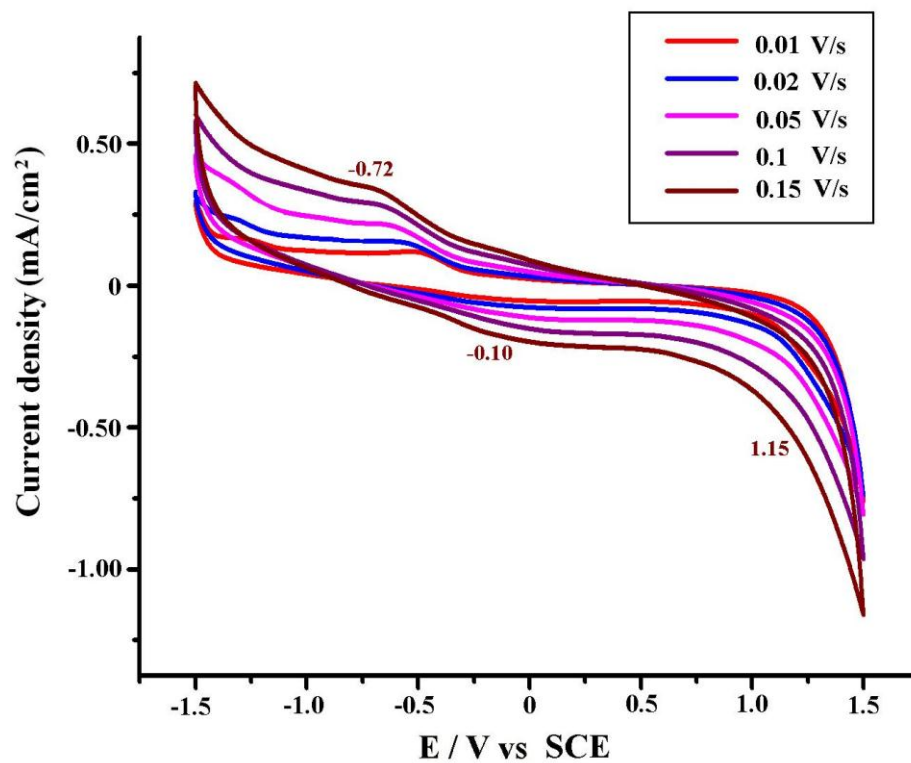

**Fig. S4** Cyclic voltammograms of the bare GCE in an aqueous solution buffered to neutral pH (0.2 M phosphate, pH = 6.8) containing 4 mg L at different sweep rates.

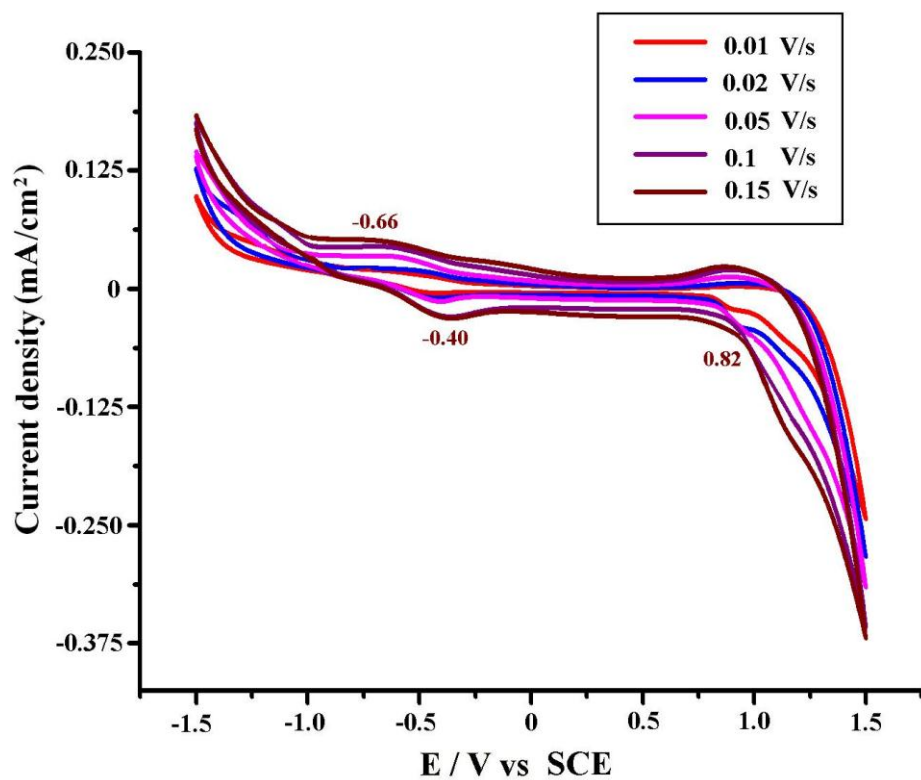

**Fig. S5** Cyclic voltammograms of **1-GCE** in an aqueous solution buffered to neutral pH (0.2 M phosphate, pH = 6.8) at different sweep rates.

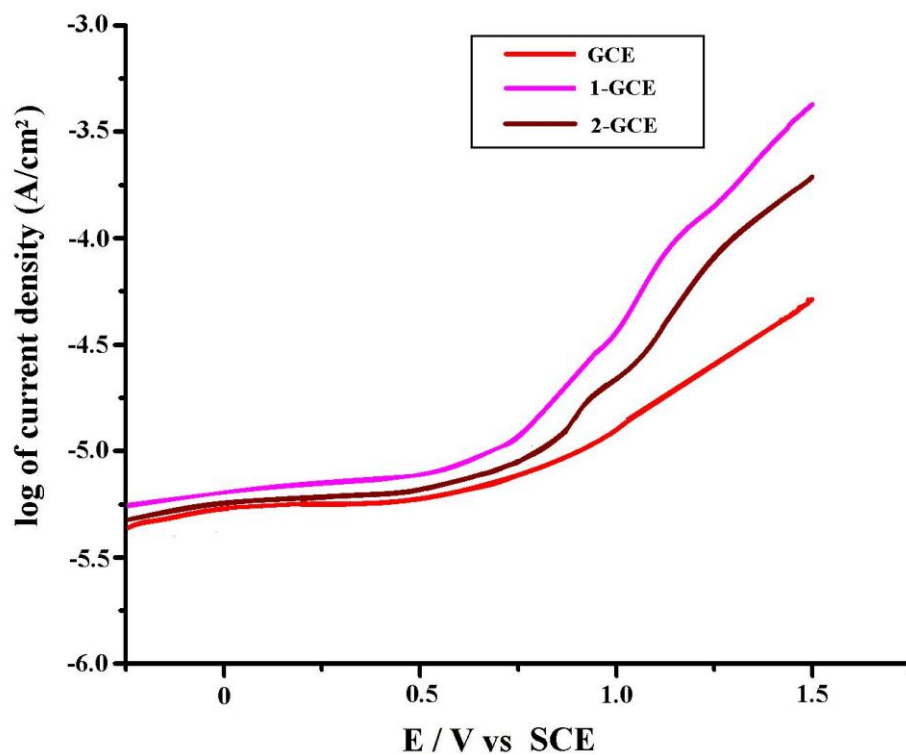

**Fig. S6** Tafel plots in the potential range from -0.3 to 1.5 V vs SCE of **1-GCE**, **2-GCE** and the bare **GCE** in aqueous solution buffered to neutral pH by 0.2 M phosphate at sweep rates of  $5 \text{ mV} \cdot \text{s}^{-1}$ .



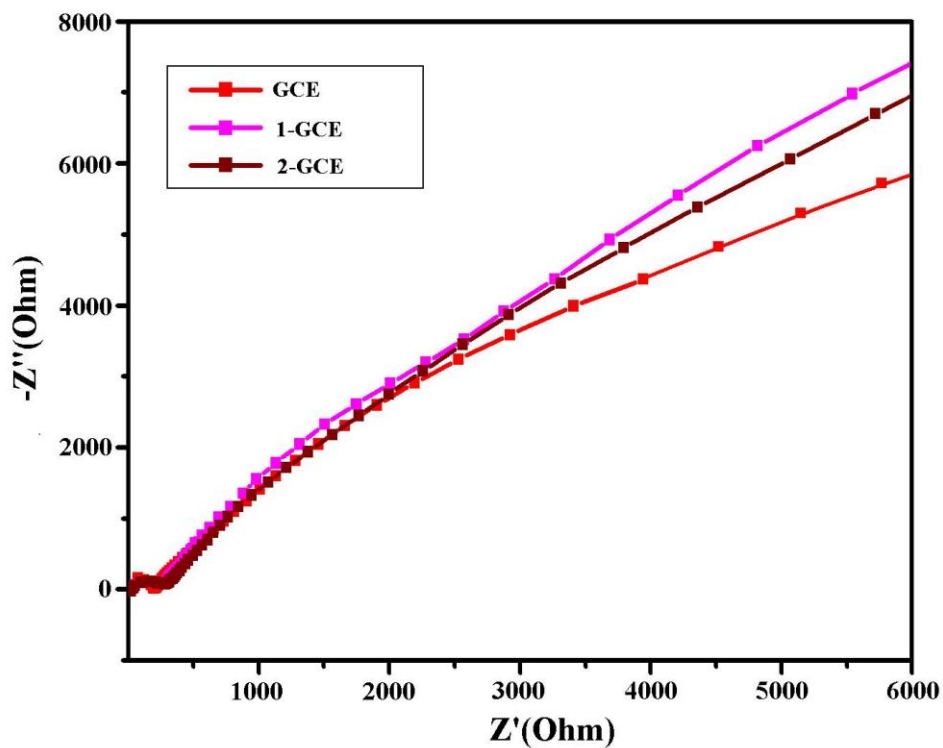

**Fig. S7** Nyquist plots ( $Z'$  vs.  $-Z''$ ) of the three-electrode systems in an aqueous solution buffered to neutral pH (0.2 M phosphate, pH = 6.8) with the bare **GCE**, **1-GCE** and **2-GCE** as working electrodes, respectively.

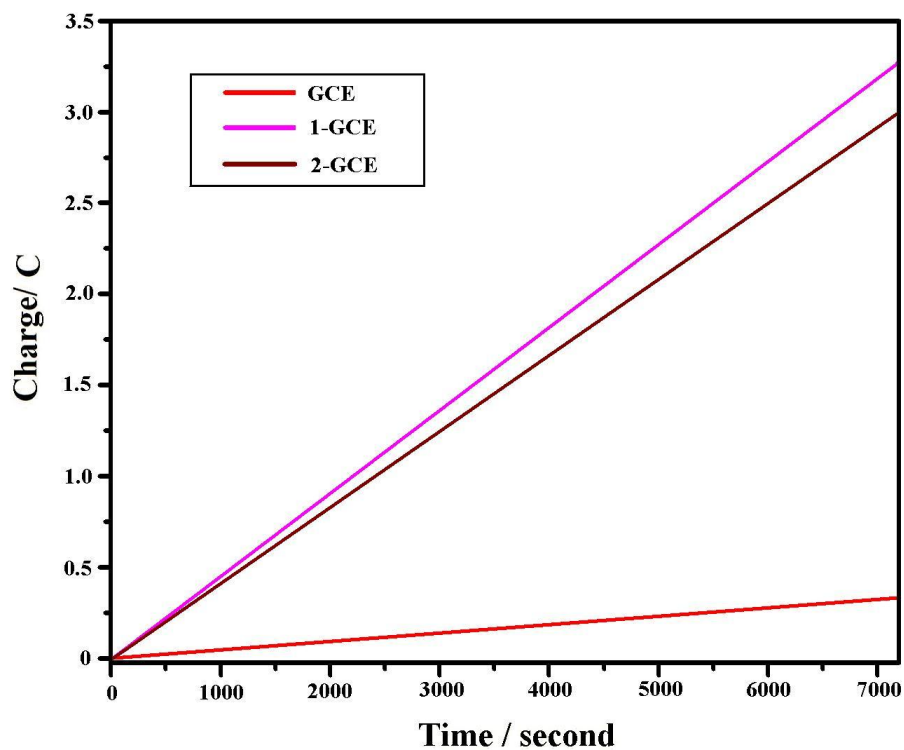

**Fig. S8** Controlled potential electrolysis of **1-GCE** (current density = 2.32 mA/cm<sup>2</sup>), **2-GCE** (current density = 2.09 mA/cm<sup>2</sup>) and bare **GCE** (current density = 0.25 mA/cm<sup>2</sup>) in aqueous solution buffered to neutral pH by 0.2 M phosphate, showing charge buildup versus time with an applied potential of + 1.4 V vs SCE ( $\eta = +0.81$  V).

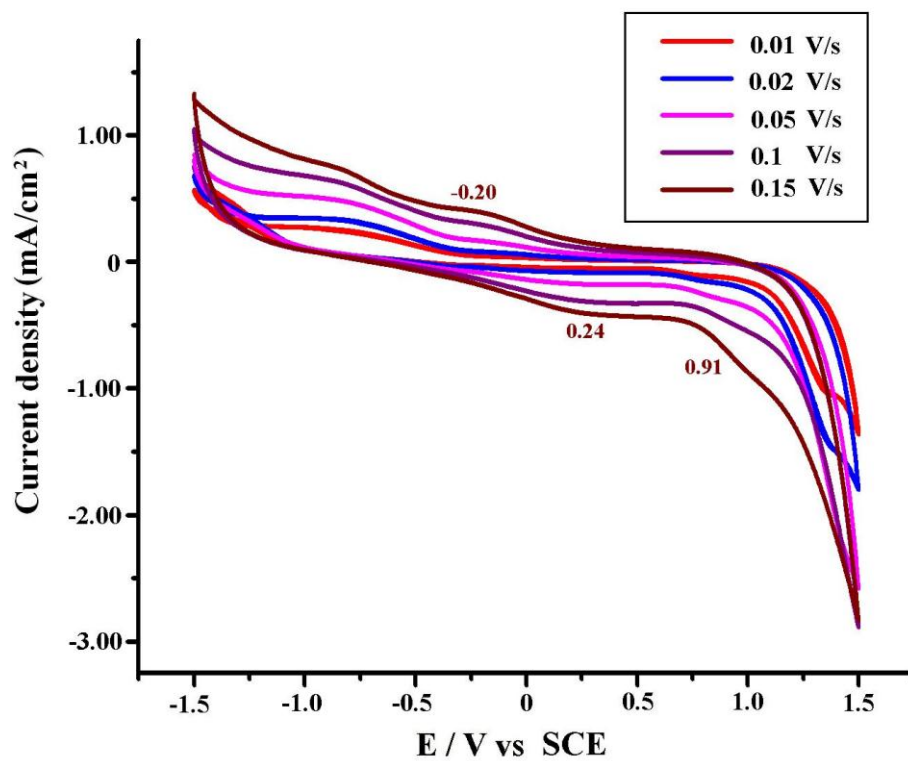

**Fig. S9** Cyclic voltammograms of **2-GCE** in an aqueous solution buffered to neutral pH (0.2 M phosphate, pH 6.8) at different sweep rates.

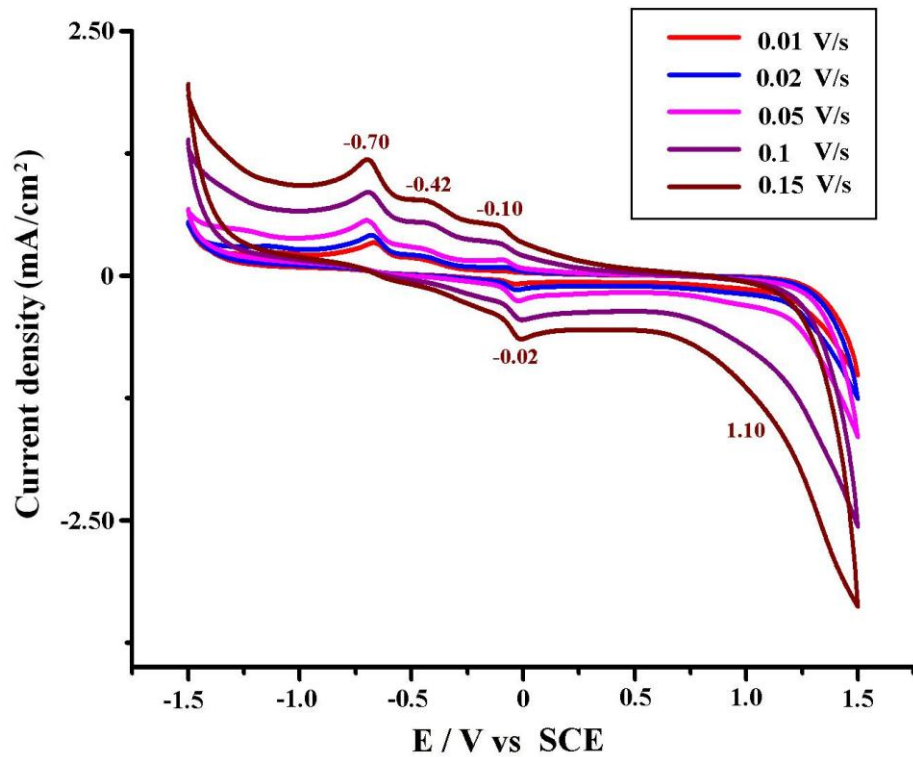

**Fig. S10** Cyclic voltammograms of the bare GCE in an aqueous solution buffered to neutral pH (0.2 M phosphate, pH = 6.8) containing 4 mg **5-H<sub>2</sub>bdc** at different sweep rates.

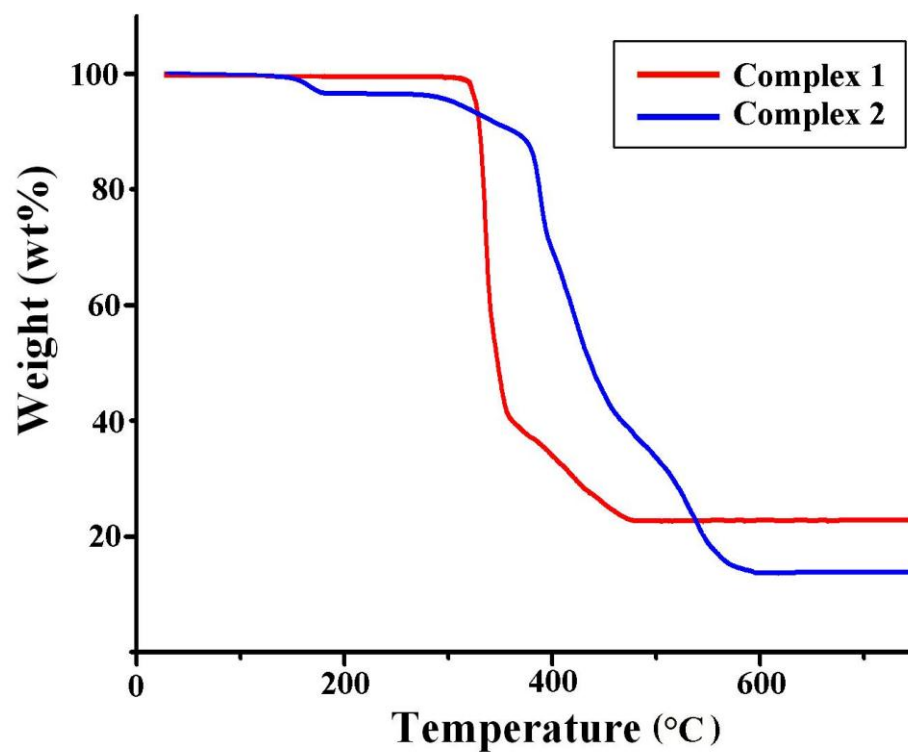

**Fig. S11** Thermogravimetric curves of complexes **1 (red)** and **2 (blue)**.

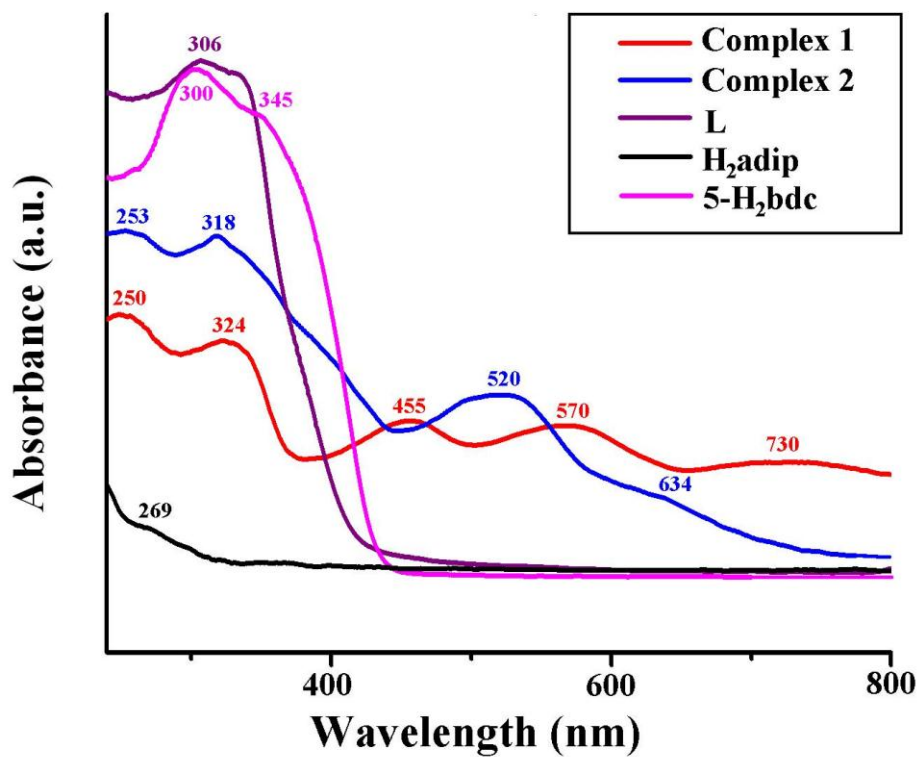

**Fig. S12** UV-vis absorption spectra at room temperature for the free ligands and complexes **1-2**.

**Reference:**

- 1 Y. J. Sun, J. P. Bigi, N. A. Piro, M. L. Tang, J. R. Long and C. J. Chang, *J. Am. Chem. Soc.*, **2011**, *133*, 9212.
